# Supplementary material for: A Diels–Alder super diene breaking benzene into C2H2 and C4H4 units
Source: Springer Nature journal article supplement (doi:10.1038/ncomms4018), 2014-01-08
Supplement: 41467_2014_BFncomms4018_MOESM9_ESM.mol [file 41467_2014_BFncomms4018_MOESM9_ESM.mol]

  ChemDraw12121310562D

 29 31  0  0  0  0  0  0  0  0999 V2000
   -2.0129    0.1512    0.0000 C   0  0  0  0  0  0  0  0  0  0  0  0
   -2.0129   -0.6738    0.0000 C   0  0  0  0  0  0  0  0  0  0  0  0
   -1.2984   -1.0863    0.0000 C   0  0  0  0  0  0  0  0  0  0  0  0
   -0.5839   -0.6738    0.0000 C   0  0  0  0  0  0  0  0  0  0  0  0
   -0.5839    0.1512    0.0000 C   0  0  0  0  0  0  0  0  0  0  0  0
   -1.2984    0.5637    0.0000 C   0  0  0  0  0  0  0  0  0  0  0  0
   -1.5119    1.3606    0.0000 Si  0  0  0  0  0  0  0  0  0  0  0  0
    0.1305    0.5637    0.0000 C   0  0  0  0  0  0  0  0  0  0  0  0
   -0.0006   -1.2572    0.0000 Si  0  0  0  0  0  0  0  0  0  0  0  0
   -1.2984   -1.9113    0.0000 Si  0  0  0  0  0  0  0  0  0  0  0  0
    0.8450    0.1512    0.0000 C   0  0  0  0  0  0  0  0  0  0  0  0
    1.5595    0.5637    0.0000 C   0  0  0  0  0  0  0  0  0  0  0  0
    1.5595    1.3887    0.0000 C   0  0  0  0  0  0  0  0  0  0  0  0
    0.8450    1.8012    0.0000 C   0  0  0  0  0  0  0  0  0  0  0  0
    0.1305    1.3887    0.0000 C   0  0  0  0  0  0  0  0  0  0  0  0
   -0.5815    1.7998    0.0000 F   0  0  0  0  0  0  0  0  0  0  0  0
    0.8450    2.6234    0.0000 F   0  0  0  0  0  0  0  0  0  0  0  0
    2.2716    1.7998    0.0000 F   0  0  0  0  0  0  0  0  0  0  0  0
    2.2716    0.1526    0.0000 F   0  0  0  0  0  0  0  0  0  0  0  0
    0.8450   -0.6711    0.0000 F   0  0  0  0  0  0  0  0  0  0  0  0
    0.8244   -1.2572    0.0000 C   0  0  0  0  0  0  0  0  0  0  0  0
   -0.6529   -1.7577    0.0000 C   0  0  0  0  0  0  0  0  0  0  0  0
    0.1068   -2.0724    0.0000 C   0  0  0  0  0  0  0  0  0  0  0  0
   -0.5839   -2.3238    0.0000 C   0  0  0  0  0  0  0  0  0  0  0  0
   -2.1206   -1.9113    0.0000 C   0  0  0  0  0  0  0  0  0  0  0  0
   -1.7095   -2.6234    0.0000 C   0  0  0  0  0  0  0  0  0  0  0  0
   -1.0994    2.0750    0.0000 C   0  0  0  0  0  0  0  0  0  0  0  0
   -2.1642    1.8611    0.0000 C   0  0  0  0  0  0  0  0  0  0  0  0
   -2.2716    1.0459    0.0000 C   0  0  0  0  0  0  0  0  0  0  0  0
  1  2  2  0      
  2  3  1  0      
  3  4  1  0      
  4  5  2  0      
  5  6  1  0      
  6  1  1  0      
  4  9  1  0      
  8  5  1  0      
  7  6  1  0      
 10  3  1  0      
  6  3  1  0      
  8 11  2  0      
 11 12  1  0      
 12 13  2  0      
 13 14  1  0      
 14 15  2  0      
 15  8  1  0      
 15 16  1  0      
 14 17  1  0      
 13 18  1  0      
 12 19  1  0      
 11 20  1  0      
  9 21  1  0      
  9 22  1  0      
  9 23  1  0      
 10 24  1  0      
 10 25  1  0      
 10 26  1  0      
  7 27  1  0      
  7 28  1  0      
  7 29  1  0      
M  END
