# Supplementary material for: A Diels–Alder super diene breaking benzene into C2H2 and C4H4 units
Source: Springer Nature journal article supplement (doi:10.1038/ncomms4018), 2014-01-08
Supplement: 41467_2014_BFncomms4018_MOESM11_ESM.mol [file 41467_2014_BFncomms4018_MOESM11_ESM.mol]

  ChemDraw12121310562D

 27 28  0  0  0  0  0  0  0  0999 V2000
   -0.2776   -0.2097    0.0000 C   0  0  0  0  0  0  0  0  0  0  0  0
   -1.1054   -0.2097    0.0000 C   0  0  0  0  0  0  0  0  0  0  0  0
   -1.1054   -1.1732    0.0000 C   0  0  0  0  0  0  0  0  0  0  0  0
   -0.2776   -1.1732    0.0000 C   0  0  0  0  0  0  0  0  0  0  0  0
   -1.6907    0.3756    0.0000 Si  0  0  0  0  0  0  0  0  0  0  0  0
   -1.6907   -1.7586    0.0000 Si  0  0  0  0  0  0  0  0  0  0  0  0
    0.3078   -1.7586    0.0000 Si  0  0  0  0  0  0  0  0  0  0  0  0
    1.1046   -1.5450    0.0000 C   0  0  0  0  0  0  0  0  0  0  0  0
   -2.4876   -1.5450    0.0000 C   0  0  0  0  0  0  0  0  0  0  0  0
   -1.4772    1.1725    0.0000 C   0  0  0  0  0  0  0  0  0  0  0  0
   -2.4876    0.5892    0.0000 C   0  0  0  0  0  0  0  0  0  0  0  0
   -2.2741   -0.2077    0.0000 C   0  0  0  0  0  0  0  0  0  0  0  0
   -1.9042   -2.5555    0.0000 C   0  0  0  0  0  0  0  0  0  0  0  0
   -1.1073   -2.3419    0.0000 C   0  0  0  0  0  0  0  0  0  0  0  0
   -0.2756   -2.3419    0.0000 C   0  0  0  0  0  0  0  0  0  0  0  0
    0.5213   -2.5555    0.0000 C   0  0  0  0  0  0  0  0  0  0  0  0
    0.3058    0.3737    0.0000 C   0  0  0  0  0  0  0  0  0  0  0  0
    1.1054    0.1594    0.0000 C   0  0  0  0  0  0  0  0  0  0  0  0
    1.6907    0.7447    0.0000 C   0  0  0  0  0  0  0  0  0  0  0  0
    1.4764    1.5443    0.0000 C   0  0  0  0  0  0  0  0  0  0  0  0
    0.6769    1.7586    0.0000 C   0  0  0  0  0  0  0  0  0  0  0  0
    0.0915    1.1732    0.0000 C   0  0  0  0  0  0  0  0  0  0  0  0
   -0.7053    1.3868    0.0000 F   0  0  0  0  0  0  0  0  0  0  0  0
    0.4633    2.5555    0.0000 F   0  0  0  0  0  0  0  0  0  0  0  0
    2.0598    2.1277    0.0000 F   0  0  0  0  0  0  0  0  0  0  0  0
    2.4876    0.5312    0.0000 F   0  0  0  0  0  0  0  0  0  0  0  0
    1.3189   -0.6375    0.0000 F   0  0  0  0  0  0  0  0  0  0  0  0
  1  2  2  0      
  2  3  1  0      
  3  4  2  0      
  4  1  1  0      
  2  5  1  0      
  3  6  1  0      
  4  7  1  0      
  7  8  1  0      
  6  9  1  0      
  5 10  1  0      
  5 11  1  0      
  5 12  1  0      
  6 13  1  0      
  6 14  1  0      
  7 15  1  0      
  7 16  1  0      
  1 17  1  0      
 17 18  2  0      
 18 19  1  0      
 19 20  2  0      
 20 21  1  0      
 21 22  2  0      
 22 17  1  0      
 22 23  1  0      
 21 24  1  0      
 20 25  1  0      
 19 26  1  0      
 18 27  1  0      
M  END
